# Supplementary material for: Insomnia Increases Symptom Severity and Health Care Utilization in Patients With Fibromyalgia: A Population-based Study
Source: PubMed Central journal article supplement — Clin J Pain. 2019 Jul 2;35(9):780–5. doi: 10.1097/AJP.0000000000000738 (PMC6693978; doi:10.1097/ajp.0000000000000738), 2019-07-02
Supplement: ajp-35-780-s001.pdf [file ajp-35-780-s001.pdf]

Appendix 1. The International Classification of Diseases, Ninth Revision, Clinical Modification (ICD-9-CM) codes used in the study

| Diseases                         | ICD-9-CM codes                                |
|----------------------------------|-----------------------------------------------|
| Fibromyalgia                     | 729.1                                         |
| Insomnia                         | 307.42–307.44, 780.52                         |
| Depression                       | 296.2, 296.3, 311                             |
| Anxiety                          | 300.0, 300.2, 300.3, 308.3, 309,81            |
| Charlson Comorbidity Index (CCI) |                                               |
| Myocardial infarction            | 410–410.9, 412                                |
| Congestive heart failure         | 428–428.9                                     |
| Peripheral vascular disease      | 443.9, 441, 441.9, 785.4, V43.4               |
|                                  | Procedure 38.48                               |
| Cerebrovascular disease          | 430–438                                       |
| Dementia                         | 290–290.9                                     |
| Chronic pulmonary disease        | 490–496, 500–505, 506.4                       |
| Rheumatologic disease            | 710.0, 710.1, 710.4, 714.0–714.2, 714.81, 725 |

|                                                 |                                                               |
|-------------------------------------------------|---------------------------------------------------------------|
| Peptic ulcer disease                            | 531–534.9, 531.4–531.7, 532.4–532.7, 533.4–533.7, 534.4–534.7 |
| Mild liver disease                              | 571.2, 571.5, 571.6, 571.4–571.49                             |
| Diabetes                                        | 250–250.3, 250.7                                              |
| Diabetes with chronic complications             | 250.4–250.6                                                   |
| Hemiplegia or paraplegia                        | 344.1, 342–342.9                                              |
| Renal disease                                   | 582–582.9, 583–583.7, 585, 586, 588–588.9                     |
| Any malignancy, including leukemia and lymphoma | 140–172.9, 174–195.8, 200–208.9                               |
| Moderate or severe liver disease                | 572.2–572.8, 456.0–456.21                                     |
| Metastatic solid tumor                          | 196–199.1                                                     |
| AIDS                                            | 042–044.9                                                     |

---
