# Supplementary material for: Insomnia Increases Symptom Severity and Health Care Utilization in Patients With Fibromyalgia: A Population-based Study
Source: PubMed Central journal article supplement — Clin J Pain. 2019 Jul 2;35(9):780–5. doi: 10.1097/AJP.0000000000000738 (PMC6693978; doi:10.1097/ajp.0000000000000738), 2019-07-02
Supplement: ajp-35-780-s002.pdf [file ajp-35-780-s002.pdf]

## Appendix 2. Anatomical Therapeutic Chemical (ATC) codes used in the study

| Drugs            | ATC codes    |
|------------------|--------------|
| Hypnotics        | N05CD, N05CF |
| Antidepressant   | N06A         |
| TCA              | N06AA        |
| SSRI             | N06AB        |
| SNRI             | N06AX        |
| Gabapentin       | N03AX12      |
| Pregabalin       | N03AX16      |
| Muscle relaxants | M03          |
| Opioids          | N02A         |
| Tramadol         | N02AX02      |
