# Supplementary material for: Insomnia Increases Symptom Severity and Health Care Utilization in Patients With Fibromyalgia: A Population-based Study
Source: PubMed Central journal article supplement — Clin J Pain. 2019 Jul 2;35(9):780–5. doi: 10.1097/AJP.0000000000000738 (PMC6693978; doi:10.1097/ajp.0000000000000738), 2019-07-02
Supplement: ajp-35-780-s003.pdf [file ajp-35-780-s003.pdf]

Appendix 3. The ambulatory visits and costs for treating insomnia and other conditions according to insomnia status in patients with fibromyalgia

|                                                        | Insomnia          |                    |
|--------------------------------------------------------|-------------------|--------------------|
|                                                        | Yes<br>(n = 5466) | No<br>(n = 12 454) |
| Ambulatory visits for insomnia/person-year             | 1.11              | 0.00               |
| Ambulatory visits for other conditions/person-year     | 27.95             | 17.62              |
| Ambulatory costs for insomnia, NTD/person-year         | 1108.00           | 0.00               |
| Ambulatory costs for other conditions, NTD/person-year | 28125.53          | 16851.18           |
