# Supplementary material for: Insomnia Increases Symptom Severity and Health Care Utilization in Patients With Fibromyalgia: A Population-based Study
Source: PubMed Central journal article supplement — Clin J Pain. 2019 Jul 2;35(9):780–5. doi: 10.1097/AJP.0000000000000738 (PMC6693978; doi:10.1097/ajp.0000000000000738), 2019-07-02
Supplement: ajp-35-780-s004.pdf [file ajp-35-780-s004.pdf]

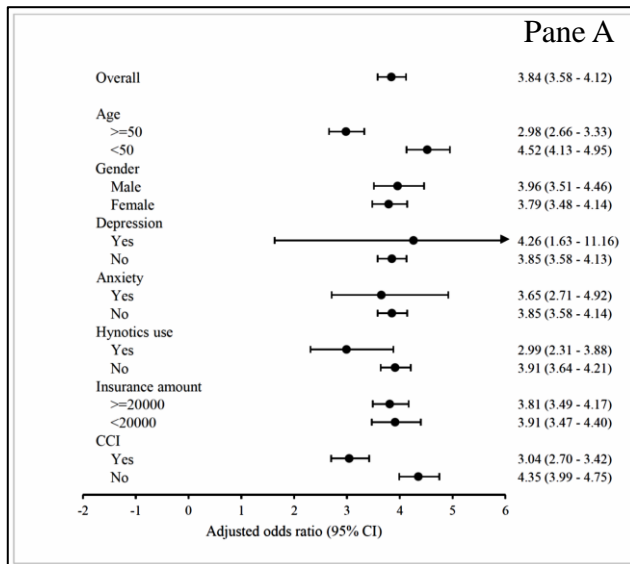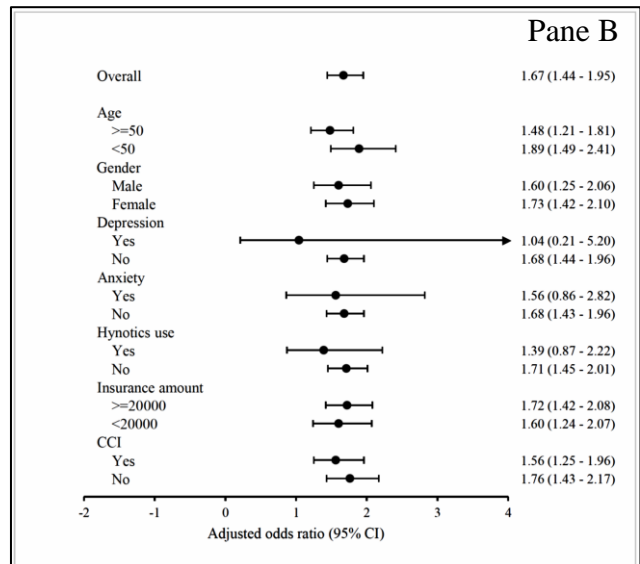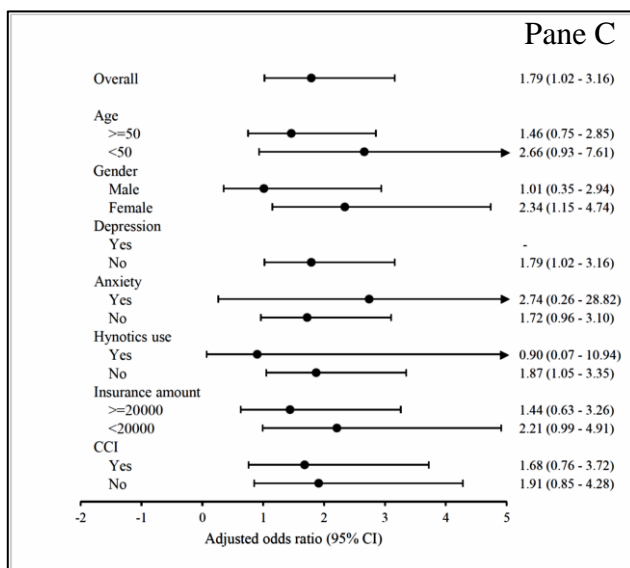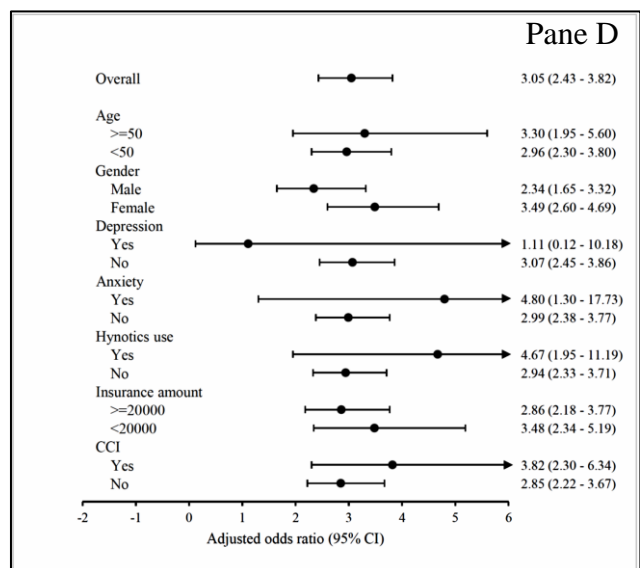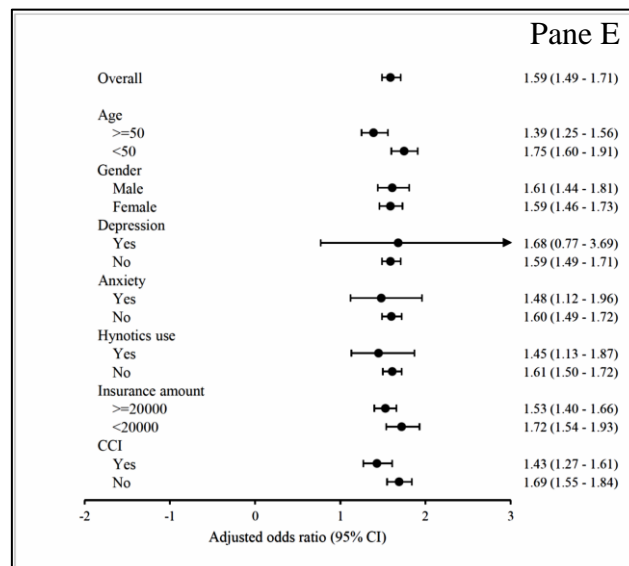

Appendix 4. The association between insomnia status and fibromyalgia-related medications stratified according to age group, gender, presence of depression, presence of anxiety, presence of hypnotics use,

level of insurance premium, and the Charlson Comorbidity Index score. Pane A. Antidepressants; Panel B. Gabapentin; Panel C. Pregabalin; Panel D Muscle relaxants; and Panel E. Opioids and Tramadol.
